# Supplementary material
Source: PubMed Central journal article supplement (PMC7172838)
Supplement: mmc7.pdf [file mmc7.pdf]

# INDIVIDUAL CONFLICT OF INTEREST STATEMENT

## *American Association of Hip and Knee Surgeons*

(Adopted from the American Academy of Orthopaedic Surgeons disclosure statement)

The following form **must be filled out completely and submitted by each author (example, 6 authors, 6 forms).**  
**All items require a response. If there is no relevant disclosure for a given item, enter "None."**

---

### Manuscript Title

1. Royalties from a company or supplier (The following conflicts were disclosed)

OrthoGrid

2. Speakers bureau/paid presentations for a company or supplier (The following conflicts were disclosed)

3A. Paid employee for a company or supplier (The following conflicts were disclosed)

3B. Paid consultant for a company or supplier (The following conflicts were disclosed)

Stryker, Smith & Nephew, OrthoGrid, DJO Surgical

3C. Unpaid consultants for a company or supplier (The following conflicts were disclosed)

4. Stock or stock options in a company or supplier (The following conflicts were disclosed)

OrthoGrid, Conexions

5. Research support from a company or supplier as a Principal Investigator (The following conflicts were disclosed)

Stryker, Zimmer/Biomet

6. Other financial or material support from a company or supplier (The following conflicts were disclosed)

7. Royalties, financial or material support from publishers (The following conflicts were disclosed)

8. Medical/Orthopaedic publications editorial/governing board (The following conflicts were disclosed)

Editorial Board for Journal of Arthroplasty

9. Board member/committee appointments for a society (The following conflicts were disclosed)

Orthopaedic Video Theater Committee Member for AAOS, Education and Program Committee Member for AAHKS

**Each author must sign AND print or type his/her name, date and submit a separate form**

In addition, one BLINDED Conflict of Interest form (no author names used) should be submitted per manuscript with all author disclosures.

---

Jeremy Gililand, MD

Author Name (Print or Type)

  
Author Signature

3/23/2020

Date
